# Supplementary material for: Factors associated with lower knowledge of HIV and STI transmission, testing and treatment among MSM in Ireland: findings from the MSM Internet Survey Ireland (MISI) 2015
Source: HighWire-hosted journal article supplement (doi:10.1136/sextrans-2020-054469), 2020-10-26
Supplement: sextrans-2020-054469supp002_data_supplement.pdf [file sextrans-2020-054469supp002_data_supplement.pdf]

STROBE Statement—Checklist of items that should be included in reports of *cross-sectional studies*

| Item Number | Section                  | Recommendation                                                                                                                                                                                                                  | Presence in Study | Page Number |
|-------------|--------------------------|---------------------------------------------------------------------------------------------------------------------------------------------------------------------------------------------------------------------------------|-------------------|-------------|
| 1           | Title and abstract       | (a) Indicate the study's design with a commonly used term in the title or the abstract                                                                                                                                          | Y                 | 2           |
|             |                          | (b) Provide in the abstract an informative and balanced summary of what was done and what was found                                                                                                                             | Y                 | 2           |
|             | <b>Introduction</b>      |                                                                                                                                                                                                                                 |                   |             |
| 2           | Background/rationale     | Explain the scientific background and rationale for the investigation being reported                                                                                                                                            | Y                 | 3           |
| 3           | Objectives               | State specific objectives, including any prespecified hypotheses                                                                                                                                                                | Y                 | 3           |
|             | <b>Methods</b>           |                                                                                                                                                                                                                                 |                   |             |
| 4           | Study design             | Present key elements of study design early in the paper                                                                                                                                                                         | Y                 | 4           |
| 5           | Setting                  | Describe the setting, locations, and relevant dates, including periods of recruitment, exposure, follow-up, and data collection                                                                                                 | Y                 | 4           |
| 6           | Participants             | Give the eligibility criteria, and the sources and methods of selection of participants                                                                                                                                         | Y                 | 4           |
| 7           | Variables                | Clearly define all outcomes, exposures, predictors, potential confounders, and effect modifiers. Give diagnostic criteria, if applicable                                                                                        | Y                 | 4 & 5       |
| 8           | Data sources/measurement | For each variable of interest, give sources of data and details of methods of assessment (measurement). Describe comparability of assessment methods if there is more than one group                                            | Y                 | 4-6         |
| 9           | Bias                     | Describe any efforts to address potential sources of bias                                                                                                                                                                       | Y                 | 4           |
| 10          | Study size               | Explain how the study size was arrived at                                                                                                                                                                                       | Y                 | 4           |
| 11          | Quantitative variables   | Explain how quantitative variables were handled in the analyses. If applicable, describe which groupings were chosen and why                                                                                                    | Y                 | 6           |
| 12          | Statistical methods      | (a) Describe all statistical methods, including those used to control for confounding                                                                                                                                           | Y                 | 6           |
|             |                          | (b) Describe any methods used to examine subgroups and interactions                                                                                                                                                             | Y                 | 6           |
|             |                          | (c) Explain how missing data were addressed                                                                                                                                                                                     | Y                 | 6           |
|             |                          | (d) If applicable, describe analytical methods taking account of sampling strategy                                                                                                                                              | Y                 | 6           |
|             |                          | (e) Describe any sensitivity analyses                                                                                                                                                                                           | Y                 | 6           |
|             | <b>Results</b>           |                                                                                                                                                                                                                                 |                   |             |
| 13          | Participants             | (a) Report numbers of individuals at each stage of study—eg numbers potentially eligible, examined for eligibility, confirmed eligible, included in the study, completing follow-up, and analysed                               | Y                 | 8           |
|             |                          | (b) Give reasons for non-participation at each stage                                                                                                                                                                            | N                 | -           |
|             |                          | (c) Consider use of a flow diagram                                                                                                                                                                                              | N                 | -           |
| 14          | Descriptive data         | (a) Give characteristics of study participants (eg demographic, clinical, social) and information on exposures and potential confounders<br>(b) Indicate number of participants with missing data for each variable of interest | Y<br>N            | 8<br>-      |
| 15          | Outcome data             | Report numbers of outcome events or summary measures                                                                                                                                                                            | Y                 | 8           |
| 16          | Main results             | (a) Give unadjusted estimates and, if applicable, confounder-adjusted estimates and their precision (eg, 95% confidence interval). Make clear which confounders were adjusted for and why they were included                    | Y                 | 10          |
|             |                          | (b) Report category boundaries when continuous variables were categorized                                                                                                                                                       | Y                 | 10          |
|             |                          | (c) If relevant, consider translating estimates of relative risk into absolute risk for a meaningful time period                                                                                                                | N/A               | -           |
| 17          | Other analyses           | Report other analyses done—eg analyses of subgroups and interactions, and sensitivity analyses                                                                                                                                  | Y                 | 11          |
|             | <b>Discussion</b>        |                                                                                                                                                                                                                                 |                   |             |
| 18          | Key results              | Summarise key results with reference to study objectives                                                                                                                                                                        | Y                 | 13          |
| 19          | Limitations              | Discuss limitations of the study, taking into account sources of potential bias or imprecision. Discuss both direction and magnitude of any potential bias                                                                      | Y                 | 14 & 15     |
| 20          | Interpretation           | Give a cautious overall interpretation of results considering objectives, limitations, multiplicity of analyses, results from similar studies, and other relevant evidence                                                      | Y                 | 12 - 15     |
| 21          | Generalisability         | Discuss the generalisability (external validity) of the study results                                                                                                                                                           | Y                 | 15          |
|             | <b>Other information</b> |                                                                                                                                                                                                                                 |                   |             |
| 22          | Funding                  | Give the source of funding and the role of the funders for the present study and, if applicable, for the original study on which the present article is based                                                                   | Y                 | 15          |
